# Supplementary material
Source: Springer Nature journal article supplement (https://www.springermedizin.de/resource/supplementary/12931_2013_1361_MOESM1_ESM.pdf/9426094)
Supplement: MOESM1 [file 9426094]

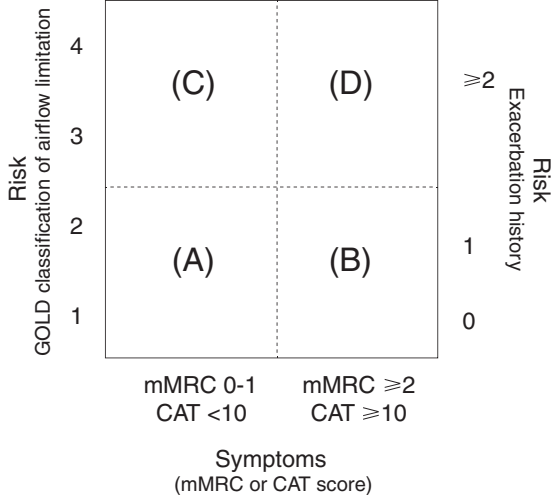

| Patient category | Characteristics          | Spirometric classification | Exacerbations per year | mMRC     | CAT       |
|------------------|--------------------------|----------------------------|------------------------|----------|-----------|
| A                | Low risk: less symptoms  | GOLD 1-2                   | $\leq 1$               | 0-1      | <10       |
| B                | Low risk: more symptoms  | GOLD 1-2                   | $\leq 1$               | $\geq 2$ | $\geq 10$ |
| C                | High risk: less symptoms | GOLD 3-4                   | $\geq 2$               | 0-1      | <10       |
| D                | High risk: more symptoms | GOLD 3-4                   | $\geq 2$               | $\geq 2$ | $\geq 10$ |
